# Supplementary material for: A Neurocomputational Model of Stimulus-Specific Adaptation to Oddball and Markov Sequences
Source: PLOS journal article supplement (doi:10.1371/journal.pcbi.1002117), 2011-08-18
Supplement: S1 (10.1371/journal.pcbi.1002117.s001) [file journal.pcbi.1002117.s001]

301 Moved Permanently

# Moved Permanently

The document has moved here.

---

Apache Server at www.ploscompbiol.org Port 80
